# Supplementary material for: Dietary Patterns in Pregnancy and the Postpartum Period and the Relationship with Maternal Weight up to One Year after Pregnancy Complicated by Gestational Diabetes
Source: MDPI journal article supplement (doi:10.3390/nu15194258), 2023-10-05
Supplement: s1 [file s1]

**Table S1.** Adjusted associations \* between food items with the highest factor loading of each dietary pattern identified during pregnancy and postpartum BMI modification \*\* in women with pregnancy complicated by gestational diabetes mellitus. LINDA-Brasil Study.

|                            | BMI at six months postpartum |               |         | BMI at twelve months postpartum |              |         |
|----------------------------|------------------------------|---------------|---------|---------------------------------|--------------|---------|
|                            | RR                           | [95% CI]      | P-value | RR                              | [95% CI]     | P-value |
| <b>Pregnancy</b>           |                              |               |         |                                 |              |         |
| <b>Risk pattern</b>        |                              |               |         |                                 |              |         |
| <b>Fried foods</b>         |                              |               |         |                                 |              |         |
| <b>Model 1</b>             |                              |               |         |                                 |              |         |
| 0-1/week                   |                              |               |         |                                 |              |         |
| 2-4/week                   | 0.93                         | [0.75 - 1.15] | 0.511   | 0.96                            | [0.77- 1.19] | 0.733   |
| 5-7/week                   | 1.61                         | [1.25 - 2.07] | <0.001  | 1.47                            | [1.08- 2.02] | 0.015   |
| <b>Model 2</b>             |                              |               |         |                                 |              |         |
| 0-1/week                   |                              |               |         |                                 |              |         |
| 2-4/week                   | 1.01                         | [0.82 - 1.25] | 0.899   | 1.04                            | [0.84- 1.29] | 0.709   |
| 5-7/week                   | 1.83                         | [1.42 - 2.37] | <0.001  | 1.48                            | [1.06- 2.07] | 0.022   |
| <b>Model 3</b>             |                              |               |         |                                 |              |         |
| 0-1/week                   |                              |               |         |                                 |              |         |
| 2-4/week                   | 1.01                         | [0.82 - 1.25] | 0.928   | 1.04                            | [0.84- 1.29] | 0.694   |
| 5-7/week                   | 1.83                         | [1.43 - 2.34] | <0.001  | 1.48                            | [1.06- 2.07] | 0.023   |
| <b>Cookies and sweets</b>  |                              |               |         |                                 |              |         |
| <b>Model 1</b>             |                              |               |         |                                 |              |         |
| 0-1/week                   |                              |               |         |                                 |              |         |
| 2-4/week                   | 1.01                         | [0.84- 1.22]  | 0.870   | 0.89                            | [0.73- 1.09] | 0.276   |
| 5-7/week                   | 1.03                         | [0.81- 1.31]  | 0.804   | 0.87                            | [0.66- 1.13] | 0.292   |
| <b>Model 2</b>             |                              |               |         |                                 |              |         |
| 0-1/week                   |                              |               |         |                                 |              |         |
| 2-4/week                   | 1.08                         | [0.90 - 1.30] | 0.389   | 0.94                            | [0.77- 1.15] | 0.546   |
| 5-7/week                   | 1.16                         | [0.91- 1.48]  | 0.236   | 0.92                            | [0.70- 1.21] | 0.550   |
| <b>Model 3</b>             |                              |               |         |                                 |              |         |
| 0-1/week                   |                              |               |         |                                 |              |         |
| 2-4/week                   | 1.07                         | [0.89- 1.28]  | 0.477   | 0.93                            | [0.76- 1.13] | 0.460   |
| 5-7/week                   | 1.15                         | [0.90- 1.47]  | 0.254   | 0.92                            | [0.70- 1.20] | 0.536   |
| <b>Sweetened beverages</b> |                              |               |         |                                 |              |         |
| <b>Model 1</b>             |                              |               |         |                                 |              |         |
| 0-1/week                   |                              |               |         |                                 |              |         |
| 2-4/week                   | 1.05                         | [0.86- 1.29]  | 0.618   | 0.84                            | [0.66- 1.06] | 0.151   |
| 5-7/week                   | 1.24                         | [1.03- 1.49]  | 0.022   | 1.24                            | [1.03- 1.48] | 0.019   |
| <b>Model 2</b>             |                              |               |         |                                 |              |         |
| 0-1/week                   |                              |               |         |                                 |              |         |
| 2-4/week                   | 1.09                         | [0.89- 1.33]  | 0.395   | 0.85                            | [0.68- 1.08] | 0.194   |
| 5-7/week                   | 1.33                         | [1.10- 1.60]  | 0.003   | 1.30                            | [1.08- 1.55] | 0.005   |
| <b>Model 3</b>             |                              |               |         |                                 |              |         |
| 0-1/week                   |                              |               |         |                                 |              |         |
| 2-4/week                   | 1.09                         | [0.89- 1.33]  | 0.400   | 0.86                            | [0.68- 1.09] | 0.217   |
| 5-7/week                   | 1.31                         | [1.09- 1.58]  | 0.004   | 1.29                            | [1.08- 1.55] | 0.005   |
| <b>Processed meat</b>      |                              |               |         |                                 |              |         |

**Model 1**

|          |      |        |       |       |      |        |       |       |
|----------|------|--------|-------|-------|------|--------|-------|-------|
| 0-1/week |      |        |       |       |      |        |       |       |
| 2-4/week | 1.06 | [0.88- | 1.27] | 0.529 | 0.97 | [0.80- | 1.17] | 0.746 |
| 5-7/week | 1.20 | [0.97- | 1.48] | 0.074 | 1.07 | [0.85- | 1.33] | 0.581 |

**Model 2**

|          |      |              |       |      |              |       |
|----------|------|--------------|-------|------|--------------|-------|
| 0-1/week |      |              |       |      |              |       |
| 2-4/week | 1.05 | [0.87- 1.26] | 0.571 | 0.94 | [0.78- 1.14] | 0.554 |
| 5-7/week | 1.20 | [0.97- 1.48] | 0.094 | 1.07 | [0.85- 1.34] | 0.531 |

**Model 3**

|          |      |              |       |      |              |       |
|----------|------|--------------|-------|------|--------------|-------|
| 0-1/week |      |              |       |      |              |       |
| 2-4/week | 1.04 | [0.87- 1.25] | 0.625 | 0.94 | [0.77- 1.13] | 0.506 |
| 5-7/week | 1.18 | [0.95- 1.45] | 0.122 | 1.07 | [0.85- 1.33] | 0.564 |

**Healthy pattern**

## Red meat without visible fat

**Model 1**

|          |      |              |       |      |              |       |
|----------|------|--------------|-------|------|--------------|-------|
| 0-1/week |      |              |       |      |              |       |
| 2-4/week | 0.84 | [0.70- 1.00] | 0.005 | 0.91 | [0.75- 1.10] | 0.346 |
| 5-7/week | 1.15 | [0.94- 1.40] | 0.170 | 1.16 | [0.94- 1.43] | 0.153 |

**Model 2**

|          |      |              |       |      |              |       |
|----------|------|--------------|-------|------|--------------|-------|
| 0-1/week |      |              |       |      |              |       |
| 2-4/week | 0.83 | [0.69- 1.00] | 0.054 | 0.89 | [0.74- 1.08] | 0.240 |
| 5-7/week | 1.16 | [0.95- 1.41] | 0.149 | 1.15 | [0.94- 1.42] | 0.166 |

**Model 3**

|          |      |              |       |      |              |       |
|----------|------|--------------|-------|------|--------------|-------|
| 0-1/week |      |              |       |      |              |       |
| 2-4/week | 0.84 | [0.70- 1.00] | 0.057 | 0.89 | [0.74- 1.08] | 0.247 |
| 5-7/week | 1.15 | [0.95- 1.41] | 0.156 | 1.15 | [0.94- 1.42] | 0.158 |

## Raw salad

**Model 1**

|          |      |              |       |      |              |       |
|----------|------|--------------|-------|------|--------------|-------|
| 0-1/week |      |              |       |      |              |       |
| 2-4/week | 0.89 | [0.70- 1.12] | 0.322 | 0.74 | [0.57- 0.95] | 0.019 |
| 5-7/week | 0.82 | [0.65- 1.03] | 0.094 | 0.87 | [0.69- 1.09] | 0.239 |

**Model 2**

|          |      |              |       |      |              |       |
|----------|------|--------------|-------|------|--------------|-------|
| 0-1/week |      |              |       |      |              |       |
| 2-4/week | 0.85 | [0.67- 1.08] | 0.179 | 0.73 | [0.57- 0.94] | 0.014 |
| 5-7/week | 0.77 | [0.61- 0.97] | 0.027 | 0.84 | [0.67- 1.05] | 0.126 |

**Model 3**

|          |      |              |       |      |              |       |
|----------|------|--------------|-------|------|--------------|-------|
| 0-1/week |      |              |       |      |              |       |
| 2-4/week | 0.85 | [0.67- 1.07] | 0.176 | 0.73 | [0.56- 0.93] | 0.012 |
| 5-7/week | 0.77 | [0.62- 0.97] | 0.029 | 0.84 | [0.67- 1.05] | 0.129 |

## Cooked salad

**Model 1**

|          |      |              |       |      |              |       |
|----------|------|--------------|-------|------|--------------|-------|
| 0-1/week |      |              |       |      |              |       |
| 2-4/week | 1.00 | [0.84- 1.20] | 0.987 | 0.92 | [0.76- 1.11] | 0.387 |
| 5-7/week | 0.78 | [0.61- 0.99] | 0.048 | 0.77 | [0.60- 0.98] | 0.039 |

**Model 2**

|          |      |              |       |      |              |       |
|----------|------|--------------|-------|------|--------------|-------|
| 0-1/week |      |              |       |      |              |       |
| 2-4/week | 0.99 | [0.82- 1.18] | 0.909 | 0.91 | [0.75- 1.09] | 0.315 |
| 5-7/week | 0.75 | [0.59- 0.96] | 0.026 | 0.75 | [0.59- 0.95] | 0.020 |

**Model 3**

|          |      |              |       |      |              |       |
|----------|------|--------------|-------|------|--------------|-------|
| 0-1/week |      |              |       |      |              |       |
| 2-4/week | 0.99 | [0.83- 1.19] | 0.992 | 0.91 | [0.75- 1.09] | 0.298 |
| 5-7/week | 0.76 | [0.59- 0.97] | 0.029 | 0.75 | [0.59- 0.95] | 0.019 |

**DASH**

## Low fat dairy

**Model 1**

0-1/week

2-4/week 0.94 [0.70- 1.28] 0.714 1.08 [0.83- 1.40] 0.564

5-7/week 1.12 [0.95- 1.32] 0.158 0.99 [0.84- 1.18] 0.964

**Model 2**

0-1/week

2-4/week 0.93 [0.68- 1.26] 0.642 1.09 [0.83- 1.42] 0.533

5-7/week 1.09 [0.92- 1.28] 0.309 0.97 [0.81- 1.15] 0.722

**Model 3**

0-1/week

2-4/week 0.95 [0.71- 1.30] 0.769 0.98 [0.78- 1.24] 0.915

5-7/week 1.08 [0.92- 1.27] 0.337 0.95 [0.56- 1.57] 0.847

\* Poisson regressions with robust variance adjusted for the outcome; \*\* increase in BMI between 2 months and 6 months to 12 months postpartum and frequency of exposure of dietary items. Model 1: Adjusted for age, skin color, income, city, smoking during pregnancy and number of previous pregnancies. Model 2: Adjusted for model 1 + pre-pregnancy BMI and Gestational weight gain. Model 3: Adjusted for model 2 + Breastfeeding in the follow-up period.

**Table S2.** Adjusted associations \* between food items with the highest factor loading of each dietary pattern identified six months after delivery and postpartum BMI modification \*\* in women with pregnancy complicated by gestational diabetes mellitus. LINDA-Brasil Study.

|                            | BMI at six months postpartum |              |         | BMI at twelve months postpartum |              |         |
|----------------------------|------------------------------|--------------|---------|---------------------------------|--------------|---------|
|                            | RR                           | [95% CI]     | P-value | RR                              | [95% CI]     | P-value |
| Postpartum                 |                              |              |         |                                 |              |         |
| <b>Risk pattern</b>        |                              |              |         |                                 |              |         |
| <b>Sweetened beverages</b> |                              |              |         |                                 |              |         |
| <b>Model 1</b>             |                              |              |         |                                 |              |         |
| 0-1/week                   |                              |              |         |                                 |              |         |
| 2-4/week                   | 1.14                         | [0.93- 1.40] | 0.213   | 1.06                            | [0.85- 1.32] | 0.610   |
| 5-7/week                   | 1.09                         | [0.89- 1.34] | 0.386   | 1.24                            | [1.01- 1.52] | 0.015   |
| <b>Model 2</b>             |                              |              |         |                                 |              |         |
| 0-1/week                   |                              |              |         |                                 |              |         |
| 2-4/week                   | 1.18                         | [0.96- 1.44] | 0.109   | 1.08                            | [0.86- 1.35] | 0.516   |
| 5-7/week                   | 1.16                         | [0.95- 1.42] | 0.147   | 1.27                            | [1.04- 1.55] | 0.017   |
| <b>Model 3</b>             |                              |              |         |                                 |              |         |
| 0-1/week                   |                              |              |         |                                 |              |         |
| 2-4/week                   | 1.17                         | [0.95- 1.43] | 0.136   | 1.06                            | [0.85- 1.33] | 0.583   |
| 5-7/week                   | 1.16                         | [0.95- 1.41] | 0.154   | 1.27                            | [1.04- 1.55] | 0.019   |
| <b>Fried foods</b>         |                              |              |         |                                 |              |         |
| <b>Model 1</b>             |                              |              |         |                                 |              |         |
| 0-1/week                   |                              |              |         |                                 |              |         |
| 2-4/week                   | 1.08                         | [0.89- 1.31] | 0.428   | 0.92                            | [0.73- 1.16] | 0.487   |
| 5-7/week                   | 1.63                         | [1.15- 2.31] | 0.006   | 1.42                            | [0.90- 2.24] | 0.126   |
| <b>Model 2</b>             |                              |              |         |                                 |              |         |
| 0-1/week                   |                              |              |         |                                 |              |         |
| 2-4/week                   | 1.07                         | [0.88- 1.29] | 0.507   | 0.87                            | [0.70- 1.09] | 0.234   |
| 5-7/week                   | 1.85                         | [1.39- 2.47] | <0.001  | 1.50                            | [1.01- 2.23] | 0.043   |
| <b>Model 3</b>             |                              |              |         |                                 |              |         |
| 0-1/week                   |                              |              |         |                                 |              |         |

|                            |      |              |        |      |              |       |
|----------------------------|------|--------------|--------|------|--------------|-------|
| 2-4/week                   | 1.05 | [0.86- 1.27] | 0.645  | 0.86 | [0.68- 1.08] | 0.189 |
| 5-7/week                   | 1.87 | [1.40; 2.50) | <0.001 | 1.52 | [1.00- 2.29] | 0.047 |
| <b>Processed meat</b>      |      |              |        |      |              |       |
| <b>Model 1</b>             |      |              |        |      |              |       |
| 0-1/week                   |      |              |        |      |              |       |
| 2-4/week                   | 1.12 | [0.95- 1.32] | 0.185  | 0.99 | [0.82- 1.19] | 0.912 |
| 5-7/week                   | 0.95 | [0.72- 1.25] | 0.712  | 1.18 | [0.93- 1.50] | 0.179 |
| <b>Model 2</b>             |      |              |        |      |              |       |
| 0-1/week                   |      |              |        |      |              |       |
| 2-4/week                   | 1.12 | [0.95- 1.33] | 0.173  | 0.98 | [0.81- 1.17] | 0.810 |
| 5-7/week                   | 0.93 | [0.71- 1.21] | 0.580  | 1.15 | [0.91- 1.47] | 0.242 |
| <b>Model 3</b>             |      |              |        |      |              |       |
| 0-1/week                   |      |              |        |      |              |       |
| 2-4/week                   | 1.11 | [0.94- 1.32] | 0.195  | 0.97 | [0.81- 1.17] | 0.774 |
| 5-7/week                   | 0.90 | [0.70- 1.18] | 0.451  | 1.13 | [0.89- 1.44] | 0.307 |
| <b>Cookies and sweets</b>  |      |              |        |      |              |       |
| <b>Model 1</b>             |      |              |        |      |              |       |
| 0-1/week                   |      |              |        |      |              |       |
| 2-4/week                   | 1.11 | [0.93- 1.32] | 0.227  | 1.09 | [0.92- 1.30] | 0.313 |
| 5-7/week                   | 1.36 | [1.08- 1.70] | 0.008  | 0.98 | [0.74- 1.31] | 0.910 |
| <b>Model 2</b>             |      |              |        |      |              |       |
| 0-1/week                   |      |              |        |      |              |       |
| 2-4/week                   | 1.16 | [0.98- 1.37] | 0.082  | 1.18 | [0.94- 1.33] | 0.209 |
| 5-7/week                   | 1.44 | [1.14- 1.82] | 0.002  | 0.97 | (0.73- 1.29] | 0.850 |
| <b>Model 3</b>             |      |              |        |      |              |       |
| 0-1/week                   |      |              |        |      |              |       |
| 2-4/week                   | 1.16 | [0.98- 1.37] | 0.091  | 1.11 | [0.94- 1.33] | 0.211 |
| 5-7/week                   | 1.44 | [1.14- 1.82] | 0.002  | 0.97 | [0.73- 1.30] | 0.860 |
| <b>Mixed pattern</b>       |      |              |        |      |              |       |
| <b>Natural fruit juice</b> |      |              |        |      |              |       |
| <b>Model 1</b>             |      |              |        |      |              |       |
| 0-1/week                   |      |              |        |      |              |       |
| 2-4/week                   | 1.11 | [0.91- 1.36] | 0.290  | 0.98 | [0.79- 1.22] | 0.879 |
| 5-7/week                   | 0.92 | [0.71- 1.19] | 0.547  | 0.87 | [0.66- 1.15] | 0.339 |
| <b>Model 2</b>             |      |              |        |      |              |       |
| 0-1/week                   |      |              |        |      |              |       |
| 2-4/week                   | 1.09 | [0.90- 1.33] | 0.375  | 0.96 | [0.78- 1.19] | 0.742 |
| 5-7/week                   | 0.90 | [0.70- 1.17] | 0.444  | 0.87 | [0.66- 1.15] | 0.343 |
| <b>Model 3</b>             |      |              |        |      |              |       |
| 0-1/week                   |      |              |        |      |              |       |
| 2-4/week                   | 1.08 | [0.89- 1.32] | 0.417  | 0.96 | [0.77- 1.18] | 0.687 |
| 5-7/week                   | 0.91 | [0.70; 1.17) | 0.463  | 0.87 | [0.66- 1.15] | 0.329 |
| <b>Salty snacks</b>        |      |              |        |      |              |       |
| <b>Model 1</b>             |      |              |        |      |              |       |
| 0-1/week                   |      |              |        |      |              |       |
| 2-4/week                   | 1.00 | [0.84- 1.19] | 0.946  | 1.07 | [0.90- 1.28] | 0.454 |
| 5-7/week                   | 1.00 | [0.80- 1.26] | 0.994  | 1.20 | [0.96- 1.49] | 0.098 |
| <b>Model 2</b>             |      |              |        |      |              |       |
| 0-1/week                   |      |              |        |      |              |       |
| 2-4/week                   | 0.98 | [0.83- 1.17] | 0.880  | 1.06 | [0.89- 1.27] | 0.506 |
| 5-7/week                   | 0.97 | [0.77- 1.22] | 0.782  | 1.13 | [0.90- 1.40] | 0.284 |

**Model 3**

|          |      |              |       |      |              |       |  |
|----------|------|--------------|-------|------|--------------|-------|--|
| 0-1/week |      |              |       |      |              |       |  |
| 2-4/week | 0.98 | [0.83- 1.16] | 0.866 | 1.07 | [0.89- 1.27] | 0.464 |  |
| 5-7/week | 0.94 | [0.75- 1.19] | 0.638 | 1.11 | [0.89- 1.39] | 0.348 |  |

## Fruits

**Model 1**

|          |      |              |       |      |              |        |  |
|----------|------|--------------|-------|------|--------------|--------|--|
| 0-1/week |      |              |       |      |              |        |  |
| 2-4/week | 0.89 | [0.73- 1.08] | 0.242 | 0.81 | [0.66- 0.98] | 0.032  |  |
| 5-7/week | 0.87 | [0.72- 1.08] | 0.176 | 0.76 | [0.63- 0.93] | 0.0078 |  |

**Model 2**

|          |      |              |       |      |              |       |  |
|----------|------|--------------|-------|------|--------------|-------|--|
| 0-1/week |      |              |       |      |              |       |  |
| 2-4/week | 0.86 | [0.71- 1.05] | 0.147 | 0.79 | [0.65- 0.96] | 0.020 |  |
| 5-7/week | 0.84 | [0.69- 1.03] | 0.090 | 0.75 | [0.61- 0.91] | 0.004 |  |

**Model 3**

|          |      |              |       |      |              |       |  |
|----------|------|--------------|-------|------|--------------|-------|--|
| 0-1/week |      |              |       |      |              |       |  |
| 2-4/week | 0.87 | [0.71- 1.06] | 0.166 | 0.79 | [0.65- 0.96] | 0.021 |  |
| 5-7/week | 0.86 | [0.72- 1.05] | 0.128 | 0.76 | [0.62- 0.92] | 0.006 |  |

## Chicken

**Model 1**

|          |      |              |       |      |              |       |  |
|----------|------|--------------|-------|------|--------------|-------|--|
| 0-1/week |      |              |       |      |              |       |  |
| 2-4/week | 0.82 | [0.66- 1.03] | 0.092 | 1.01 | [0.76- 1.35] | 0.912 |  |
| 5-7/week | 0.75 | [0.58- 0.98] | 0.037 | 1.00 | [0.73- 1.36] | 0.996 |  |

**Model 2**

|          |      |              |       |      |              |       |  |
|----------|------|--------------|-------|------|--------------|-------|--|
| 0-1/week |      |              |       |      |              |       |  |
| 2-4/week | 0.78 | [0.62- 0.97] | 0.031 | 0.97 | [0.74- 1.28] | 0.844 |  |
| 5-7/week | 0.70 | [0.54- 0.91] | 0.008 | 0.96 | [0.70- 1.30] | 0.781 |  |

**Model 3**

|          |      |              |       |      |              |       |  |
|----------|------|--------------|-------|------|--------------|-------|--|
| 0-1/week |      |              |       |      |              |       |  |
| 2-4/week | 0.79 | [0.63- 0.98] | 0.037 | 0.97 | [0.74- 1.28] | 0.857 |  |
| 5-7/week | 0.70 | [0.53- 0.91] | 0.008 | 0.95 | [0.70- 1.29] | 0.744 |  |

**DASH Type**

## Cooked salad

**Model 1**

|          |      |              |       |      |              |       |  |
|----------|------|--------------|-------|------|--------------|-------|--|
| 0-1/week |      |              |       |      |              |       |  |
| 2-4/week | 0.94 | [0.78- 1.12] | 0.473 | 0.83 | [0.69- 0.98] | 0.037 |  |
| 5-7/week | 0.97 | [0.76- 1.23] | 0.784 | 0.81 | [0.63- 1.05] | 0.115 |  |

**Model 2**

|          |      |              |       |      |              |       |  |
|----------|------|--------------|-------|------|--------------|-------|--|
| 0-1/week |      |              |       |      |              |       |  |
| 2-4/week | 0.91 | [0.77- 1.09] | 0.315 | 0.82 | [0.69- 0.98] | 0.030 |  |
| 5-7/week | 0.96 | [0.76- 1.22] | 0.770 | 0.83 | [0.65- 1.07] | 0.149 |  |

**Model 3**

|          |      |              |       |      |              |       |  |
|----------|------|--------------|-------|------|--------------|-------|--|
| 0-1/week |      |              |       |      |              |       |  |
| 2-4/week | 0.92 | [0.77- 1.09] | 0.333 | 0.83 | [0.69- 0.98] | 0.034 |  |
| 5-7/week | 0.99 | [0.78- 1.25] | 0.928 | 0.85 | [0.66- 1.09] | 0.209 |  |

## Raw salad

**Model 1**

|          |      |              |       |      |              |       |  |
|----------|------|--------------|-------|------|--------------|-------|--|
| 0-1/week |      |              |       |      |              |       |  |
| 2-4/week | 0.90 | [0.74- 1.11] | 0.333 | 0.85 | [0.69- 1.03] | 0.099 |  |
| 5-7/week | 0.90 | [0.73- 1.10] | 0.327 | 0.73 | [0.59- 0.89] | 0.003 |  |

**Model 2**

0-1/week

|                |      |              |       |      |              |        |
|----------------|------|--------------|-------|------|--------------|--------|
| 2-4/week       | 0.85 | [0.70- 1.05] | 0.131 | 0.80 | [0.66- 0.97] | 0.026  |
| 5-7/week       | 0.85 | [0.69- 1.04] | 0.118 | 0.68 | [0.55- 0.84] | <0.001 |
| <b>Model 3</b> |      |              |       |      |              |        |
| 0-1/week       |      |              |       |      |              |        |
| 2-4/week       | 0.85 | [0.69- 1.05] | 0.132 | 0.80 | [0.65- 0.97] | 0.024  |
| 5-7/week       | 0.84 | [0.68- 1.04] | 0.115 | 0.68 | [0.55- 0.84] | <0.001 |
| Low fat dairy  |      |              |       |      |              |        |
| <b>Model 1</b> |      |              |       |      |              |        |
| 0-1/week       |      |              |       |      |              |        |
| 2-4/week       | 1.07 | [0.85- 1.34] | 0.566 | 0.99 | [0.78- 1.26] | 0.960  |
| 5-7/week       | 0.85 | [0.46- 1.54] | 0.605 | 0.97 | [0.62- 1.54] | 0.916  |
| <b>Model 2</b> |      |              |       |      |              |        |
| 0-1/week       |      |              |       |      |              |        |
| 2-4/week       | 1.07 | [0.85- 1.34] | 0.980 | 0.98 | [0.78- 1.24] | 0.910  |
| 5-7/week       | 0.78 | [0.40- 1.52] | 0.476 | 0.93 | [0.56- 1.54] | 0.790  |
| <b>Model 3</b> |      |              |       |      |              |        |
| 0-1/week       |      |              |       |      |              |        |
| 2-4/week       | 1.07 | [0.85- 1.33] | 0.555 | 0.99 | [0.78- 1.24] | 0.915  |
| 5-7/week       | 0.81 | [0.42- 1.58] | 0.538 | 0.95 | [0.58- 1.57] | 0.847  |

\* Poisson regressions with robust variance adjusted for the outcome increase in. \*\* BMI between 2 months and 6 months to 12 months post-partum and frequency of exposure of dietary items. Model 1: Adjusted for age, skin color, income, city, smoking during pregnancy and number of previous pregnancies. Model 2: Adjusted for model 1 + pre-pregnancy BMI and Gestational weight gain. Model 3: Adjusted for model 2 + + Breastfeeding in the follow-up period.
